# Supplementary material for: Gengnianchun, a Traditional Chinese Medicine, Enhances Oxidative Stress Resistance and Lifespan in Caenorhabditis elegans by Modulating daf‐16/FOXO
Source: Hindawi journal article supplement (doi:10.1155/2017/8432306), 2017-01-01
Supplement: f1 [file 8432306.f1.pdf]

**Table1: Toxicity exposed to different concentrations of GNC**

| GNC<br>(mg /mL) | 0.00394 | 0.0394 | 0.394 | 3.94 | 7.88 | 15.76 | 39.4 | 78.8 |
|-----------------|---------|--------|-------|------|------|-------|------|------|
| Dead (N)        | 0       | 0      | 0     | 0    | 0    | 15    | 24   | 36   |

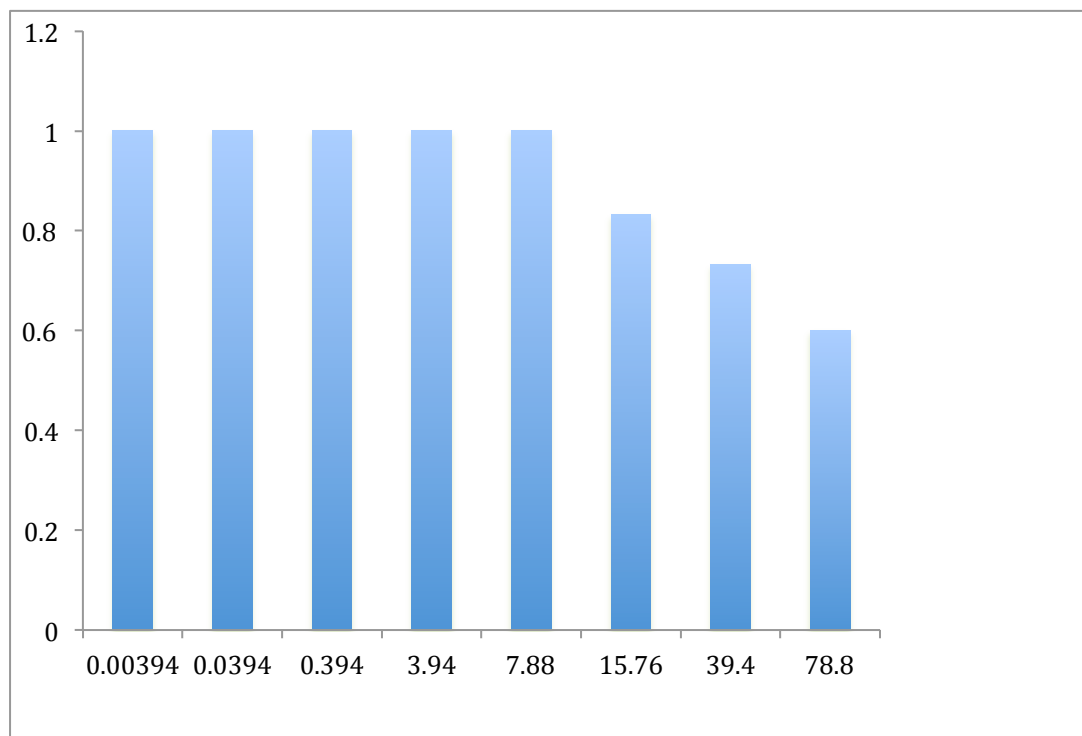

**Fig 1: Survival percentage of worms after 48 hours treated with various concentrations of GNC (mg/mL); 90 worms for each concentration.**
